# Supplementary material for: An allosteric pocket for inhibition of bacterial Enzyme I identified by NMR-based fragment screening
Source: PubMed Central journal article supplement (PMC7385036; doi:10.1016/j.yjsbx.2020.100034), 2020-07-21
Supplement: mmc1.pdf [file mmc1.pdf]

## **SUPPLEMENTARY INFORMATION**

### **An allosteric pocket for inhibition of bacterial Enzyme I identified by NMR-based fragment screening**

Trang T. Nguyen<sup>1</sup> and Vincenzo Venditti<sup>\*,1,2</sup>

<sup>1</sup> *Department of Chemistry, Iowa State University, Ames, Iowa 50011, USA.*

<sup>2</sup> *Roy J. Carver Department of Biochemistry, Biophysics and Molecular Biology, Iowa State University, Ames, Iowa 50011, USA.*

\* Address correspondence to:

Vincenzo Venditti, Department of Chemistry, Iowa State University, Hach Hall, 2438 Pammel Drive, Ames, IA 50011, USA. email: [venditti@iastate.edu](mailto:venditti@iastate.edu); Tel. 515-294-1044; Fax: 515-294-7550; ORCID 0000-0001-8734-0400.

Keywords: Mixed inhibition; competitive inhibition; antimicrobial compounds; Principal Component Analysis; bacterial phosphotransferase system; TIM barrel enzyme

|                |     |                                                                 |     |
|----------------|-----|-----------------------------------------------------------------|-----|
| E. coli        | 1   | MISGILASPGIAFGKALLLKEDEIVIDRKKISADQVDQEVERFLSGRAKASQALETIKTK    | 60  |
| C. freundii    | 1   | MISGILASPGIAFGKALLLKEDEIVIDRKKISADKVDQEVERFLSGRAKASQALEAIKTK    | 60  |
| K. pneumoniae  | 1   | MISGILASPGIAFGKALLLKEDEIVIDRKKISADKVDQEVERFLSGRAKASQALEVIKTK    | 60  |
| S. aureus      | 4   | LIKGIAASDGVAIKAYLLVPEPDLTFDKNEKVD--VEGEVAKFNSAIEASKVELTKIRNN    | 62  |
| E. faecalis    | 4   | MLKGIASDGVAVAKAYLLVQPDLSFN--KTSVEDTDAEATRLDDALAKSTEELQAIRDK     | 61  |
| N. gonorrhoeae | 4   | VLHGVAAGKGIAGVCAHLIARGTEEVPQYDVAQADTDAEAERFDAAVKATRKELEQLRSA    | 63  |
| E. coli        | 61  | AGETFGEKEEAI FEGHIMLLEDEELEQE I IALIKDKHMTADAAAHEVIEGQASALEELDD | 120 |
| C. freundii    | 61  | AGETFGEKEEAI FEGHIMLLEDEELEQE I IALIKDKHMTADAAAHEVIEGQATALEELDD | 120 |
| K. pneumoniae  | 61  | AGETFGEKEEAI FEGHIMLLEDEELEQE I IALIKDKHMTADAAAHEVIDGQATALEELDD | 120 |
| S. aureus      | 63  | AEVQLGADKAAIFDAHLLVLDDELPDIQPIQDKIKNENANAATALTDTVTTQFVTIFESMDN  | 122 |
| E. faecalis    | 62  | AAQSLGEAEAVFADAHMLVSDPEMVGQIKQNIQDNKNVAEALKEVTDYIMGFEMDD        | 121 |
| N. gonorrhoeae | 64  | IPENAPTELGAFISLHMLLTDVTLRSREPV DILREQKINAEWALKQQSDKLAQFDNMDD    | 123 |
| E. coli        | 121 | E-YLKERAADV RDIGKRLRLN ILG----LKI IDLSAIQDEVILVAADLTPSETAQLNLKK | 175 |
| C. freundii    | 121 | E-YLKERAADV RDIGKRLRLN ILG----LAI IDLSAIQEEVILVAADLTPSETAQLNLNK | 175 |
| K. pneumoniae  | 121 | E-YLKERAADV RDIGKRLRLN ILG----LAI IDLSAIQDEVILVAADLTPSETAQLNLKK | 175 |
| S. aureus      | 123 | E-YMKERAADIR DVSKRVL SHILG----VELPNPSMIDESVIVGNDLTPSDTAQLNKEF   | 177 |
| E. faecalis    | 122 | NAYMQERAADIR DVAKRI LAHLLG----VTLPNPSMINEEVIVVAHDLTPSDTAQLDRTY  | 177 |
| N. gonorrhoeae | 124 | A-YLRERKQDMLQVVRRIHNNLIGQGNELEVAD--NLFDETVLIANDLS PADTVLFKEQR   | 180 |
| E. coli        | 176 | VLGFITDAGGRS HTS IMARSLELPAIVGTGSVTSQVKNDY LILDVAVNNQVYVNPTEV   | 235 |
| C. freundii    | 176 | VLGFITDAGGRS HTS IMARSLELPAIVGTGSVTSQVKNDY LILDVAVNNQVYVNPTEV   | 235 |
| K. pneumoniae  | 176 | VLGFITDAGGRS HTS IMARSLELPAIVGTGSITAQVKNQDYLILDVAVNNQVLINPSNEQ  | 235 |
| S. aureus      | 178 | VLGFATNIGGRS HSAIMARSLEIPAI VGTKSITQEVKQGDMIIVDGLNGDVIVNPTEDE   | 237 |
| E. faecalis    | 178 | VKAFVTDIGGRS HSAIMARSLEIPAI VGTKEITDKVKAGDILAVNGIIGDVIIDPTDAE   | 237 |
| N. gonorrhoeae | 181 | IAAFVTDAGGPTG HTAILGRSLDIPSVVGLHNARKLITEGETVIVDGINGVLIISPDES    | 240 |
| E. coli        | 236 | IDKMRVQEQVASEKAELAKLKDLPAILTLDGHQVEVCANIGTVRD VEGAERNGAEGVGLY   | 295 |
| C. freundii    | 236 | IEQLRAVQEQVATEKAELAKLKDLPAILTLDGHQVEVCANIGTVRD VEGAERNGAEGVGLY  | 295 |
| K. pneumoniae  | 236 | IEALRSLQAQVAEKAELAKLKDLPAILTLDGHQVEVCANIGTVRD VEGAERNGAEGVGLY   | 295 |
| S. aureus      | 238 | LIAYQDKRERYFADKKEQLKLRDADTVTV DGVHAEALANIGTPNDLPGVIEAQAQGI GLY  | 397 |
| E. faecalis    | 238 | LSEFEAEAKAYADQKAEDWLKNAETVTADGKHVELAANIGTPKDLEGVHKNGEAVGLY      | 297 |
| N. gonorrhoeae | 241 | KNEYRRAREYRSHKRDLNKLKTAATAADGVCIELVGNIESAEDVKPLHNLGADGIGLF      | 300 |
| E. coli        | 296 | RTEFLFMDRDALPTEEEQFAAYKAVAEACGSQAVIVRTMDIGGDKELPYMNFPEE----     | 351 |
| C. freundii    | 296 | RTEFLFMDRESLPTREEQFAAYKAVAEACGSQAVIVRTMDIGGDKELPYMNFPEE----     | 351 |
| K. pneumoniae  | 296 | RTEFLFMDRDALPTEEEQFAAYKAVAEACGSQAVIVRTMDIGGDKELPYMNFPEE----     | 351 |
| S. aureus      | 298 | RTEFLYMG RDQMPTEEEQFEAYKVEAMGGKRVVVRTLDIGGDKELSYLNLPEEM----     | 353 |
| E. faecalis    | 298 | RTEFLYMDSDFPTEEDQYQAYKAVLEGMGKPVVVRTMDIGGDKELPYLTLPHEM----      | 353 |
| N. gonorrhoeae | 301 | RSEFLYLNRDTPSEDEQYEVYSAIVKMKGKSVTIRTVDLGVDKNPRW--FGKNSTPNG      | 358 |
| E. coli        | 352 | --NPFLGWRAIRIAMDR--REILRDQLRAILRASAFGKLRIMFPMIISVEEVRALRKEIE    | 407 |
| C. freundii    | 352 | --NPFLGWRAVRIAMDR--KEILRDQVRAILRASAFGKLRIMFPMIISVEEVRALRKEIE    | 407 |
| K. pneumoniae  | 352 | --NPFLGWRAVRIAMDR--KEILRDQVRAILRASAFGKLRIMFPMIISVEEVRALRKEIE    | 407 |
| S. aureus      | 354 | --NPFLGWRAIRLCLAQ--QDIFRPQLRALLRASVYGKLNIMFPMVATINEFREAKAILL    | 409 |
| E. faecalis    | 354 | --NPFLGWRAIRLISLSELGDMFRQTMRALLRASVHG NLRIMFPMVATLKEFRAAKAIFE   | 411 |
| N. gonorrhoeae | 359 | SLNPALGM TGIRLCLAE--PVMFRQTMRRAILRAAVHGPVRMMWPMITSVSEVRQCLIHL   | 415 |
| E. coli        | 408 | IYKQELRDEGKAFDESIEIGVMVETPAAAT IARHLAKEVDFFSIGTNDLTQYTLAVDRGN   | 467 |
| C. freundii    | 408 | IYKQELRDEGKAFDESIEIGVMVETPAAAT IARHLAKEVDFFSIGTNDLTQYTLAVDRGN   | 467 |
| K. pneumoniae  | 408 | IYKQELRDEGKAFDESIEIGVMVETPAAAT IARHLAKEVDFFSIGTNDLTQYTLAVDRGN   | 467 |
| S. aureus      | 410 | EEKENLNKNEGHDISDIEELGIMVEIPATAALADVFAKEVDFFSIGTNDLIQYTLAADRMS   | 469 |
| E. faecalis    | 412 | DEKQKLVNEGVEVSNDIQVGMIEIPAAAVLADKFAKEVDFFSVGTNDLIQYTMAADRMN     | 471 |
| N. gonorrhoeae | 416 | TAQRQLAERGD AFGV-GVICMIEIPSAALTVGSI LKLVDFISVGTNDLIQYILSVDRGD   | 475 |
| E. coli        | 468 | DMISHLYQPMSPSVNLRIKQVIDASHAEGKWTGMC GELAGDERATLLLLGMGLDEFMSA    | 527 |
| C. freundii    | 468 | DMISHLYQPMSPSVLTLIKQVIDASHAEGKWTGMC GELAGDERATLLLLGMGLDEFMSA    | 527 |
| K. pneumoniae  | 468 | DMISHLYQPMSPSVNLRIKQVIDASHAEGKWTGMC GELAGDERATLLLLGMGLDEFMSA    | 527 |
| S. aureus      | 470 | ERVSYLQYPYNPSILRLVKQVIEASHKEGKWTGMC GEMAGDETAIPLLLGLGLDEFMSA    | 529 |
| E. faecalis    | 472 | ERVSYLQYPYNPSILRLIKNVIDAAHAEGKWAGMCGEMAGDQTA VPLLLGMGLDEFMSA    | 531 |
| N. gonorrhoeae | 476 | DSVSHLYQPGHPSVLKMLQHVIRTANRMDKDVSVCGEMAGDTAFTRVLLGMGLRRFSMNP    | 535 |
| E. coli        | 528 | ISIPRIKKIIRNTNFEDAKVLAEQALAQ-PTTDELMTLVNKFIEEKTIC               | 575 |
| C. freundii    | 528 | ISIPRIKKIIRNTNFEDAKVLAEQALAQ-PTTDELMTLVNKFIEEKTIC               | 575 |
| K. pneumoniae  | 528 | ISIPRIKKIIRNTNFEDAKVLAEQALAQ-PTTDELMTLVNKFIEEKTIC               | 575 |
| S. aureus      | 530 | TSILKARRQINGLSKNEMTELANRAVDC-ATQEEVIELVNNYVK                    | 572 |
| E. faecalis    | 522 | TSILKTRSLMKRLDTTKMAELADRALKECDTMEEVFALVEEY                      | 573 |
| N. gonorrhoeae | 536 | NNILPVKNIIILHSN                                                 | 549 |

**Figure S1. EI sequence alignment.** The sequence of the *E. coli* EI is aligned against EI from other, randomly selected, drug-resistant bacteria: *Citrobacter freundii* (identity 97%; similarity

99%; gaps 0%), *Klebsiella pneumoniae* (identity 96%; Similarity 98%; gaps 0%), *Staphylococcus aureus* (identity 51%; similarity 70%; gaps 0%), *Enterococcus faecalis* (identity 49%; similarity 68%; gaps 1%), and *Neisseria gonorrhoeae* (identity 36%; similarity 58%; gaps 2%). Residues forming the allosteric pocket are in red. Active site residues are in bold. Blue and red lines indicate the EIN and EIC domains, respectively.
